# Supplementary material for: Proteomic analysis of in vivo-assembled pre-mRNA splicing complexes expands the catalog of participating factors
Source: PubMed Central journal article supplement — Nucleic Acids Res. 2007 May 30;35(12):3928–44. doi: 10.1093/nar/gkm347 (PMC1919476; doi:10.1093/nar/gkm347), 2007-05-30
Supplement: nar_gkm347v2_1.pdf [file nar_gkm347v2_1.pdf]

Chen et al. Supplemental Table S1.

| ENSEMBL accession # <sup>a</sup>      | HGNC <sup>b</sup> | Polypeptide <sup>c</sup> | Gg Ps <sup>a</sup> | # pep. ID <sup>b</sup> | % coverage <sup>c</sup> | Hs PS <sup>d</sup> | # pep. ID <sup>b</sup> | % coverage <sup>c</sup> |
|---------------------------------------|-------------------|--------------------------|--------------------|------------------------|-------------------------|--------------------|------------------------|-------------------------|
| <i>U1 snRNP</i>                       |                   |                          |                    |                        |                         |                    |                        |                         |
| ENSG00000104852                       | SNRP70            | U1-70K                   | •                  | 11                     | 38.3                    | •                  | 4                      | 12.1                    |
| ENSG00000077312                       | SNRPA             | U1A                      | •                  | 6                      | 24.3                    |                    |                        |                         |
| <i>U2 snRNP</i>                       |                   |                          |                    |                        |                         |                    |                        |                         |
| ENSGALG00000008038                    | SF3B1             | SF3b155                  | •                  | 35                     | 32.2                    | •                  | 26                     | 28.8                    |
| ENSG00000087365                       | SF3B2             | SF3b145                  | •                  | 12                     | 15.5                    | •                  | 9                      | 9.6                     |
| ENSGALG00000002531                    | SF3B3             | SF3b130                  | •                  | 23                     | 26.1                    | •                  | 14                     | 14.5                    |
| ENSGALG00000000581                    | DDX42             | SF3b125                  | •                  | 5                      | 18                      | •                  | 3                      | 12.5                    |
| ENSGALG00000007937                    | SF3A1             | SF3a120                  | •                  | 21                     | 30.1                    | •                  | 10                     | 21.9                    |
| ENSGALG00000021679                    | SF3A2             | SF3a66                   | •                  | 5                      | 28.3                    | •                  | 4                      | 19.2                    |
| ENSGALG00000001540                    | SF3A3             | SF3a60                   | •                  | 14                     | 29.1                    | •                  | 9                      | 24.4                    |
| ENSGALG00000013352                    | SF3B4             | SF3b49                   | •                  | 3                      | 21.7                    |                    |                        |                         |
| ENSGALG00000008729                    | SNRPB2            | U2B <sup>e</sup>         | •                  | 8                      | 29.2                    | •                  | 4                      | 23.1                    |
| ENSGALG00000007170                    | SNRPA1            | U2A <sup>e</sup>         | •                  | 10                     | 43.9                    | •                  | 8                      | 35.3                    |
| ENSGALG00000016501                    | -                 | SF3b14                   | •                  | 5                      | 36                      |                    |                        |                         |
| ENSGALG00000020000                    | SF3B5             | SF3b10                   | •                  | 2                      | 22.1                    |                    |                        |                         |
| <i>U2-snRNP associated</i>            |                   |                          |                    |                        |                         |                    |                        |                         |
| ENSGALG00000014395                    | DHX15             | PRP43/DDX15              | •                  | 25                     | 31.6                    | •                  | 13                     | 19                      |
| ENSGALG00000002612                    | -                 | SR140                    | •                  | 12                     | 13.7                    | •                  | 5                      | 5.6                     |
| ENSGALG00000006332                    | RBM17             | SPF45                    | •                  | 8                      | 23.4                    |                    |                        |                         |
| ENSGALG00000008561                    | SMNDC1            | SPF30                    | •                  | 3                      | 15.3                    |                    |                        |                         |
| ENSGALG00000003824                    | CHERP             | CHERP                    | •                  | 3                      | 5                       |                    |                        |                         |
| <i>U5, U4/U6 &amp; U4/U6•U5 snRNP</i> |                   |                          |                    |                        |                         |                    |                        |                         |
| ENSGALG00000002943                    | PRPF8             | U5-220K                  | •                  | 72                     | 33.7                    | •                  | 41                     | 21                      |
| ENSGALG00000003477                    | ASCC3L1           | U5-200K                  | •                  | 63                     | 27.8                    | •                  | 44                     | 26.8                    |
| ENSGALG00000000988                    | EFTUD2            | U5-116K                  | •                  | 31                     | 34.7                    | •                  | 22                     | 33.3                    |
| ENSG00000175467                       | SART1             | U4/U5•U5-110K            | •                  | 2                      | 5.1                     | •                  | 12                     | 19.2                    |
| ENSGALG00000006001                    | C20ORF14          | U5-102K                  | •                  | 31                     | 19.5                    | •                  | 21                     | 27.3                    |
| ENSG00000174243                       | DDX23             | U5-100K                  | •                  | 21                     | 29.9                    | •                  | 18                     | 26.4                    |
| ENSGALG00000000465                    | PRPF3             | U4/U6-90K                | •                  | 13                     | 25                      | •                  | 8                      | 24.6                    |
| ENSG00000168883                       | USP39             | U4/U6•U5-65K             | •                  | 4                      | 12.9                    | •                  | 6                      | 14.8                    |
| ENSG00000105618                       | PRPF31            | U4/U6•U5-61K             | •                  | 5                      | 20.1                    | •                  | 8                      | 23                      |
| ENSGALG00000008857                    | PRPF4             | U4/U6-60K                | •                  | 12                     | 28.7                    | •                  | 7                      | 16.1                    |
| ENSGALG00000004874                    | PPIH              | USA-CYP                  | •                  | 2                      | 24.1                    |                    |                        |                         |
| ENSGALG00000000615                    | WDR57             | U5-40K                   | •                  | 10                     | 33.5                    | •                  | 5                      | 23.2                    |
| ENSGALG00000011931                    | NHP2L1            | U4/U6•U5-15.5k           | •                  | 2                      | 12.4                    |                    |                        |                         |
| ENSGALG00000017396                    | TXNL4A            | U5-15K                   | •                  | 2                      | 16.2                    |                    |                        |                         |
| <i>AT/AC</i>                          |                   |                          |                    |                        |                         |                    |                        |                         |
| ENSGALG00000005162                    | RNPC3             | U11/U12-65K              | •                  | 2                      | 8.6                     |                    |                        |                         |
| ENSGALG00000013005                    | C6ORF151          | U11/U12-48K              | •                  | 2                      | 7.2                     |                    |                        |                         |

| <b>Sm/LSM</b>           |         |             |   |    |      |   |    |      |
|-------------------------|---------|-------------|---|----|------|---|----|------|
| ENSGALG00000007250      | SNRPB   | SmB/B'      | • | 9  | 40.2 | • | 5  | 40.7 |
| ENSGALG00000011842      | SNRPD1  | SmD1        | • | 4  | 37.8 | • | 4  | 54.6 |
| ENSG00000125743         | SNRPD2  | SmD2        | • | 12 | 13.7 | • | 5  | 44.9 |
| ENSGALG00000006596      | SNRPD3  | SmD3        | • | 4  | 47.6 | • | 5  | 40.7 |
| ENSGALG00000000137      | SNRPE   | SmE         | • | 5  | 79   | • | 2  | 19.8 |
| ENSGALG00000011409      | SNRPF   | SmF         | • | 4  | 8.7  | • | 2  | 15.1 |
| ENSG00000143977         | SNRPG   | SmG         | • | 3  | 31.3 | • | 3  | 35.5 |
| ENSG00000111987         | LSM2    | LSM2        | • | 3  | 39   |   |    |      |
| ENSGALG00000003385      | LSM4    | LSM4        | • | 3  | 31   |   |    |      |
| ENSGALG00000009985      | LSM6    | LSM6        | • | 3  | 35   | • | 3  | 36.3 |
| ENSGALP00000014820      | LSM8    | LSM8        | • | 3  | 52.1 | • | 2  | 34.3 |
| <b>snRNP biogenesis</b> |         |             |   |    |      |   |    |      |
| ENSGALG00000010154      | SIP1    | SIP1        | • | 4  | 14.7 |   |    |      |
| ENSG00000119953         | SMNDC1  | SMNrp30     | • | 2  | 6    |   |    |      |
| ENSGALG00000003158      | COIL    | Coilin      | • | 8  | 20.2 |   |    |      |
| <b>SAPs</b>             |         |             |   |    |      |   |    |      |
| ENSGALG00000002514      | SFPQ    | PSF         | • | 8  | 16.8 | • | 12 | 19.1 |
| ENSGALG00000002060      | FUS     | TLS/FUS     | • | 10 | 15.7 | • | 3  | 13.7 |
| ENSGALG00000012468      | PRPF39  | PRP39       | • | 4  | 9.8  |   |    |      |
| ENSGALG00000010501      | SNW1    | SKIP/PRP45  | • | 16 | 38.8 | • | 2  | 10.8 |
| ENSGALG00000016704      | CDC5L   | CDC5        | • | 24 | 37.7 | • | 11 | 16.3 |
| ENSGALG00000005012      | RAB43   | ISY1        | • | 4  | 20   |   |    |      |
| ENSGALG00000008429      | CRNKL1  | CRN1        | • | 15 | 24.5 | • | 4  | 6    |
| ENSGALG00000009257      | PRLG1   | Prp46/PRL1  | • | 15 | 38.6 |   |    |      |
| ENSGALG00000015061      | CDC40   | CDC40/PRP17 | • | 15 | 39.3 |   |    |      |
| ENSGALG00000002002      | BCAS2   | SPF27       | • | 4  | 27   | • | 3  | 12.5 |
| ENSGALG00000013919      | PRPF19  | PRP19       | • | 13 | 35.4 | • | 15 | 46   |
| ENSGALG00000010627      | PRPF38A | PRP38       | • | 5  | 18.3 | • | 3  | 15.6 |
| ENSGALG00000005507      | NONO    | p54nrb      | • | 5  | 14.4 | • | 5  | 13.2 |
| ENSGALG00000004555      | RBM22   | ECM2/RBM22  | • | 6  | 18.6 |   |    |      |
| ENSGALG00000001247      | SYF2    | SYF2        | • | 4  | 8.7  |   |    |      |
| ENSGALG00000000726      | ELAVL1  | ELAV/Hu     | • | 4  | 13.8 | • | 11 | 48.2 |
| ENSGALG00000009001      | -       | CWC22       | • | 7  | 9.5  |   |    |      |
| ENSGALG00000008149      | EWSR1   | EWSR1 (RBP) | • | 5  | 10   | • | 2  | 9.9  |
| ENSGALG00000004705      | BUD31   | BUD31       | • | 2  | 27.3 |   |    |      |
| ENSG00000076924         | XAB2    | SYF1        | • | 15 | 21.1 | • | 13 | 20.9 |
| ENSGALG00000001962      | PTBP1   | PTB         | • | 12 | 32.5 | • | 12 | 19.1 |
| ENSGALG00000011857      | LUC7L2  | LUC7/CROP   | • | 3  | 30.7 |   |    |      |
| ENSG00000196504         | PRPF40A | PRP40       | • | 3  | 4.2  | • | 2  | 4.5  |
| ENSGALG00000010167      | PNN     | Pinin       | • | 14 | 23   | • | 10 | 16.2 |
| ENSGALG00000012813      | PRPF4B  | Prp4K       | • | 6  | 16.1 | • | 8  | 25.2 |
| ENSGALG00000000833      | IK      | RED         | • | 7  | 12.4 | • | 7  | 21.4 |
| ENSGALG00000001500      | -       | SLU7        | • | 8  | 15.4 |   |    |      |
| ENSG000000063244        | U2AF2   | U2AF65      | • | 2  | 10.1 | • | 7  | 31   |

|                          |           |                |   |    |      |   |    |      |
|--------------------------|-----------|----------------|---|----|------|---|----|------|
| ENSGALG00000016198       | U2AF1     | U2AF35         | • | 2  | 14.6 | • | 3  | 16.9 |
| ENSGALG00000001034       | C20ORF4   | AAR2           | • | 5  | 15.1 |   |    |      |
| ENSGALG00000005525       | SFRS1     | SF2/ASF        | • | 4  | 20.3 | • | 3  | 30.6 |
| ENSGALG00000002087       | NCBP1     | CBC80          | • | 3  | 3.5  | • | 12 | 37.7 |
| ENSGALG00000006843       | NCBP2     | CBC20          | • | 3  | 28   | • | 2  | 15.1 |
| ENSG00000100296          | THOC5     | KIAA0983       | • | 5  | 11.3 | • | 2  | 6.1  |
| ENSG00000126803          | HSPA2     | HSP70-2        | • | 5  | 14.8 | • | 6  | 10.4 |
| ENSGALG00000006512       | HSPA8     | HSP71          | • | 22 | 38.8 | • | 4  | 6.1  |
| ENSGALG00000009838       | AQR       | Aquarius       | • | 25 | 17.5 | • | 20 | 22   |
| ENSGALG00000002014       | SMU1      | SMU1           | • | 10 | 33.1 | • | 4  | 19.1 |
| ENSG00000113649          | TCERG1    | CA150          |   |    |      | • | 4  | 12.1 |
| ENSGALG00000004626       | RBM5      | E1B-AP5        | • | 6  | 11.2 | • | 5  | 10.1 |
| ENSGALG00000011678       | DNAJC13   | DnaJ           | • | 8  | 8.3  | • | 4  | 5.6  |
| ENSG00000100813          | ACIN1     | Acinus         |   |    |      | • | 10 | 22.6 |
| ENSG00000131051          | RNPC2     | HCC            |   |    |      | • | 9  | 27.3 |
| ENSG00000084463          | WBP11     | WBP11          |   |    |      | • | 2  | 4.5  |
| ENSG00000196419          | XRCC6     | Ku70           |   |    |      | • | 8  | 16.4 |
|                          |           |                |   |    |      |   |    |      |
|                          |           |                |   |    |      |   |    |      |
| <b>RNA Helicase-like</b> |           |                |   |    |      |   |    |      |
| ENSGALG00000016461       | DDX1      | DDX1           | • | 10 | 18.6 | • | 8  | 16.4 |
| ENSGALG00000016231       | DDX3X     | DDX3           | • | 5  | 10.3 | • | 9  | 17.4 |
| ENSGALG00000003532       | DDX5      | DDX5/p68       | • | 16 | 28.9 |   |    |      |
| ENSGALG00000012247       | DDX17     | DDX17/p72      | • | 11 | 20.8 | • | 13 | 21.3 |
| ENSGALG00000012147       | DDX18     | DDX18          | • | 2  | 10   |   |    |      |
| ENSGALG00000006974       | DDX27     | DDX27          | • | 3  | 5.1  |   |    |      |
| ENSGALG00000003030       | DDX41     | DDX41/ABSTRAKT | • | 3  | 7.4  |   |    |      |
| ENSG00000123136          | DDX39     | DDX39          |   |    |      | • | 12 | 34.9 |
| ENSG00000145833          | DDX46     | DDX46/PRP5     |   |    |      |   | 13 | 19   |
| ENSGALG00000008530       | DDX48     | DDX48          | • | 18 | 48.4 | • | 15 | 39.7 |
| ENSGALG00000004144       | DDX50     | DDX50/Gu-β     | • | 2  | 3.8  | • | 11 | 17.3 |
| ENSGALG00000001186       | DHX8      | DHX8/PRP22     | • | 12 | 17.9 | • | 2  | 7.7  |
| ENSG00000135829          | DHX9      | DHX9/HELICASEA | • | 3  | 5.6  | • | 43 | 40.9 |
| ENSGALG00000005027       | DHX30     | DHX30          | • | 20 | 19.7 | • | 9  | 9.3  |
| ENSGALG00000003658       | DHX35     | DHX35          | • | 4  | 7.8  |   |    |      |
| ENSG00000174953          | DHX36     | DHX36          |   |    |      | • | 5  | 5.1  |
| ENSGALG00000014709       | SKIV2L2   | SKIV2L2        | • | 5  | 7.1  | • | 2  | 10.8 |
| ENSG00000198563          | BAT1      | UAP56          | • | 12 | 29.7 | • | 12 | 34.9 |
|                          |           |                |   |    |      |   |    |      |
|                          |           |                |   |    |      |   |    |      |
| <b>hnRNP</b>             |           |                |   |    |      |   |    |      |
| ENSGALG00000006160       | HNRNPA0   | hnRNP A0       | • | 4  | 10.2 | • | 7  | 35.4 |
| ENSGALG00000011036       | HNRNPA2B1 | hnRNP A2/B1    | • | 12 | 37.8 | • | 23 | 67.2 |
| ENSG00000135486          | HNRPA1    | hnRNP A1       | • | 7  | 32.7 | • | 26 | 52.9 |
| ENSGALG00000009250       | HNRNPA3   | hnRNP A3       | • | 11 | 42.9 | • | 19 | 51.6 |
| ENSGALG00000014381       | HNRNPAB   | hnRNP AB       | • | 6  | 20.7 | • | 7  | 22.1 |
| ENSG00000092199          | HNRPC     | hnRNP C1/C2    | • | 10 | 32.5 |   | 14 | 47.9 |
| ENSG00000138668          | HNRNPD    | hnRNP D0/AUF1  | • | 4  | 29.7 | • | 13 | 45.6 |
| ENSGALG00000011184       | HNRNPD    | hnRNP D0       | • | 4  | 20.6 | • | 9  | 25.4 |

|                    |         |              |   |    |      |   |    |      |
|--------------------|---------|--------------|---|----|------|---|----|------|
| ENSG00000169813    | HNRPF   | hnRNPF       |   |    |      | • | 12 | 42.4 |
| ENSGALG00000006457 | RBMX    | hnRNPG       | • | 15 | 34.3 | • | 11 | 26.9 |
| ENSGALG00000005955 | HNRNPH1 | hnRNPH1      | • | 17 | 46.4 | • | 13 | 40.3 |
| ENSGALG00000003947 | HNRNPH3 | hnRNPH3      | • | 12 | 13.7 | • | 6  | 26.9 |
| ENSGALG00000012591 | HNRNPK  | hnRNPK       | • | 18 | 46.1 | • | 18 | 49.1 |
| ENSG00000104824    | HNRNPL  | hnRNPL       | • | 7  | 13.7 | • | 14 | 33   |
| ENSGALG00000000377 | HNRNPM  | hnRNPM       | • | 24 | 38.6 | • | 21 | 37.7 |
| ENSGALG00000015830 | SYNCRIP | hnRNPM       | • | 10 | 27.3 | • | 18 | 45.8 |
| ENSGALG00000000814 | HNRNPR  | hnRNPR       | • | 11 | 22.5 | • | 21 | 42.1 |
| ENSGALG00000010671 | HNRNPU  | hnRNPU       | • | 10 | 13.1 | • | 29 | 33   |
| ENSGALG00000018665 | -       | hnRNPN novel | • | 2  | ***  |   |    |      |
| ENSG00000126457    | HRMT1L2 | HRMT1L2      | • | 2  | 11.5 |   |    |      |
|                    |         |              |   |    |      |   |    |      |
| <b>SR</b>          |         |              |   |    |      |   |    |      |
| ENSGALG00000005525 | SFRS1   | SF2p33       | • | 9  | 35.8 | • | 12 | 37.9 |
| ENSGALG00000000533 | SFRS3   | SFRS3SRp20   | • | 3  | 24.4 | • | 8  | 59.3 |
| ENSGALG00000009484 | SFRS5   | SRp40        | • | 5  | 24.8 |   |    |      |
| ENSGALG00000000990 | SFRS6   | SRp55        | • | 6  | 27.4 | • | 4  | 11.5 |
| ENSGALG00000013825 | SFRS7   | 9G8          | • | 5  | 26   | • | 6  | 37.6 |
| ENSGALG00000002487 | SFRS8   | SFRS8        | • | 6  | 10.5 |   |    |      |
| ENSG00000111786    | SFRS9   | SRp30        |   |    |      | • | 8  | 37.6 |
| ENSGALG00000006531 | SFRS10  | SFRS10       | • | 4  | 20.1 | • | 6  | 37.2 |
| ENSG00000153914    | SFRS12  | SFRS12       |   |    |      | • | 3  | 11.9 |
| ENSGALG00000004133 | FUSIP1  | SRrp35       | • | 3  | 37.1 | • | 6  | 41.8 |
|                    |         |              |   |    |      |   |    |      |
| <b>RBP</b>         |         |              |   |    |      |   |    |      |
| ENSG00000102317    | RBM3    | RBM3         |   |    |      | • | 25 | 5.6  |
| ENSGALG00000018992 | RBM4B   | RBM4B/Lark   | • | 9  | 56.8 |   |    |      |
| ENSGALG00000004626 | RBM5    | RBM5         | • | 4  | 9.1  |   |    |      |
| ENSGALG00000007017 | RBM7    | RBM7         | • | 3  | 36   |   |    |      |
| ENSG00000131795    | RBM8A   | RBM8B        | • | 3  | 17.7 | • | 4  | 31   |
| ENSGALG00000013411 | RBM14   | RBM14        | • | 6  | 12.9 | • | 8  | 15.7 |
| ENSG00000162775    | RBM15   | RBM15        |   |    |      | • | 7  | 12   |
| ENSGALG00000002372 | RBM15B  | RBM15B       | • | 7  | 15.6 | • | 3  | 8.5  |
| ENSG00000197676    | RBM16   | RBM16        |   |    |      | • | 8  | 12.3 |
| ENSGALG00000004555 | RBM22   | RBM22        | • | 5  | 17.4 |   |    |      |
| ENSG00000119707    | RBM25   | RBM25        |   |    |      | • | 4  | 8.4  |
| ENSG000000091009   | RBM27   | RBM27        |   |    |      | • | 2  | 3.2  |
| ENSGALG00000011038 | CBX3    | RNPS1        | • | 3  | 17   |   |    |      |
| ENSG00000033030    | ZCCHC8  | ZFP8         |   |    |      | • | 6  | 8.1  |
| ENSGALG00000006113 | ZNF326  | ZFP326       | • | 10 | 23.2 | • | 2  | 9.4  |
| ENSG00000179950    | -       | PUF60        |   |    |      | • | 3  | 10.9 |
| ENSG00000197381    | ADARB1  | ADAR1        |   |    |      | • | 26 | 33.7 |
| ENSG00000160710    | ADAR    | ADAR2        |   |    |      | • | 4  | 10   |
| ENSGALG00000010952 | -       | Requiem      | • | 12 | 27.2 |   |    |      |
| ENSGALG00000011570 | ILF2    | NFAT45       | • | 8  | 21.4 | • | 12 | 53.7 |
| ENSG00000129351    | ILF3    | NFAT90       | • | 10 | 15.5 | • | 12 | 18.4 |

|                                 |         |               |   |    |      |   |    |      |
|---------------------------------|---------|---------------|---|----|------|---|----|------|
| ENSG00000169564                 | PCBP1   | PolyrCBP      | • | 7  | 28.7 |   |    |      |
| ENSGALG00000012225              | CIRBP   | CIRBP         | • | 2  | 24.5 | • | 3  | 18.9 |
| ENSG00000056097                 | ZFR     | ZFR           | • | 2  | 3.4  | • | 3  | 8    |
| ENSGALG00000009427              | TIAL1   | TIA1          | • | 2  | 8.8  |   |    |      |
| ENSGALG00000001187              | STRBP   | STRBP         | • | 10 | 18.5 |   |    |      |
| ENSGALG00000005623              | TFIP11  | Tuftillin-IP  | • | 8  | 12.4 | • | 5  | 6.7  |
| ENSG00000136231                 | IGF2BP3 | IMP3          | • | 4  | 7.5  | • | 7  | 18.9 |
| ENSG00000121774                 | KHDRBS1 | SAM68         |   |    |      | • | 4  | 10.2 |
| ENSG00000126254                 | -       | Novel RRM     |   |    |      | • | 3  | 14   |
| ENSG00000132773                 | TOE1    | TOE1          |   |    |      | • | 2  | 6.7  |
| ENSG00000142864                 | SERBP1  | SERBP1        |   |    |      | • | 2  | 9.1  |
|                                 |         |               |   |    |      |   |    |      |
|                                 |         |               |   |    |      |   |    |      |
| <b>Export/transcription/NMD</b> |         |               |   |    |      |   |    |      |
| ENSGALG00000014915              | THOC1   | THO1/HPR1     | • | 11 | 26   | • | 6  | 14.6 |
| ENSGALG00000008507              | THOC2   | THO2          | • | 14 | 9.7  | • | 5  | 8    |
| ENSG00000051596                 | THOC3   | THO3/TEX1     | • | 14 | 24.2 | • | 13 | 16.3 |
| ENSGALG00000007237              | THOC4   | THO4/ALY      | • | 6  | 20.9 | • | 8  | 30.8 |
| ENSGALG00000004571              | PPP1CA  | GLC7/PPP1CA   | • | 2  | 5.3  |   |    |      |
| ENSGALG00000002569              | RAN     | Ran           | • | 5  | 30.1 | • | 2  | 4.8  |
| ENSG00000119392                 | GLE1L   | GLE1L         |   |    |      | • | 2  | 5.7  |
| ENSGALG00000007653              | RAE1    | GLE2/RAE1     | • | 3  | 8.4  | • | 7  | 13.1 |
| ENSGALG00000003220              | RENT1   | UPF1/RENT     | • | 3  | 6.4  |   |    |      |
| ENSG00000131795                 | RBM8A   | Y14/RBM8A     | • | 4  | 36.2 | • | 4  | 31   |
| ENSGALG00000002144              | THRAP3  | TRAP150       | • | 9  | 20.9 | • | 3  | 24.3 |
| ENSG00000172660                 | TAF15   | TAF15/RBP56   | • | 4  | 9.2  |   |    |      |
| ENSG00000162231                 | NXF1    | TAP           |   |    |      | • | 7  | 13.1 |
| ENSG00000065978                 | YBX1    | YBX1          |   |    |      | • | 5  | 33.5 |
| ENSGALG00000010689              | MAGOH   | Mago nashi    | • | 7  | 52.8 | • | 7  | 57.9 |
|                                 |         |               |   |    |      |   |    |      |
|                                 |         |               |   |    |      |   |    |      |
| <b>3' end proc.</b>             |         |               |   |    |      |   |    |      |
| ENSGALG00000010783              | CPSF2   | CPSF2         | • | 2  | 10.5 |   |    |      |
| ENSGALG00000016424              | CPSF3   | CPSF3         | • | 2  | 8.1  | • | 2  | 4.8  |
| ENSGALG00000004714              | CPSF4   | CPSF4         | • | 4  | 20   |   |    |      |
| ENSGALG00000003084              | CPSF5   | CPSF5         |   |    |      | • | 4  | 21.6 |
| ENSGALG00000011685              | CSTF3   | CSTF-77       | • | 3  | 4.5  | • | 3  | 6.2  |
| ENSGALG00000013943              | FIP1L1  | FIP1          | • | 4  | 7.8  |   |    |      |
| ENSG00000172239                 | PAIP1   | PAIP1         |   |    |      | • | 5  | 14.2 |
| ENSG00000100836                 | PABPN1  | PABPN1        |   |    |      | • | 5  | 16.9 |
| ENSGALG00000003800              | PABPC4  | PABPC4        |   |    |      | • | 10 | 22.6 |
|                                 |         |               |   |    |      |   |    |      |
|                                 |         |               |   |    |      |   |    |      |
| <b>Structural</b>               |         |               |   |    |      |   |    |      |
| ENSGALG00000012533              | MYH9    | Myosin        | • | 44 | 28.4 | • | 26 | 32.8 |
| ENSGALG00000009126              | TTN     | Titin         | • | 12 | ***  |   |    |      |
| ENSGALG00000001381              | ACTG1   | Actin         | • | 15 | 52   | • | 3  | 17.6 |
| ENSGALG00000002478              | MATR3   | MATRIN3       | • | 17 | 24.2 | • | 28 | 34.2 |
| ENSGALG00000008677              | VIM     | Vimentin      | • | 13 | 40.1 | • | 24 | 50.7 |
| ENSG00000117245                 | KIF17   | Kinesin KIF17 | • | 7  | 8    |   |    |      |

|                                     |          |                  |   |    |      |   |    |      |
|-------------------------------------|----------|------------------|---|----|------|---|----|------|
| ENSGALG0000002197                   | NPM1     | NUMATRIN         | • | 4  | 17   | • | 4  | 4.5  |
| ENSGALG00000014692                  | LMNB1    | Lamin B          | • | 18 | 35.8 | • | 4  | 9.9  |
| ENSGALG00000013505                  | SYNE1    | NuSpectrin       | • | 12 | ***  | • | 34 | 19.9 |
| <b>Chromatin modification</b>       |          |                  |   |    |      |   |    |      |
| ENSGALG00000000360                  | ARID1A   | ARID1A-SWI/SNF   | • | 18 | 27.4 |   |    |      |
| ENSGALG00000013683                  | ARID1B   | ARID1B-SWI/SNF   | • | 13 | 9.8  |   |    |      |
| ENSGALG00000010164                  | SMARCA2  | SMARCA2          | • | 27 | 33.4 |   |    |      |
| ENSG00000127616                     | SMARCA4  | Brahma/SMARCA4   | • | 29 | 21.3 |   |    |      |
| ENSGALG00000009913                  | SMARCA5  | SMARCA5          | • | 11 | 11   |   |    |      |
| ENSGALG00000005983                  | SMARCB1  | SMARCB1          | • | 11 | 37   |   |    |      |
| ENSGALG00000005048                  | SMARCC2  | BRG1-SWI/SNF     | • | 30 | 20.2 |   |    |      |
| ENSGALG00000005048                  | SMARCC1  | SMARCC1          | • | 21 | 19.5 |   |    |      |
| ENSGALP00000010010                  | SMARCD1  | SMARCD1          | • | 6  | 11.5 |   |    |      |
| ENSGALG00000000363                  | SMARCD2  | SMARCD2          | • | 10 | 32.9 |   |    |      |
| ENSGALG00000002100                  | SMARCE1  | SMARCE1          | • | 7  | 30.9 |   |    |      |
| <b>Nucleoporins</b>                 |          |                  |   |    |      |   |    |      |
| ENSGALG00000005714                  | PKD1     | PKD1 (NUP assoc) | • | 10 | 4.1  |   |    |      |
| ENSGALG00000003830                  | NUP214   | NUP214           | • | 7  | 4.8  | • | 4  | 4    |
| ENSGALG00000012720                  | NUP153   | NUP153           | • | 4  | 4.3  |   |    |      |
| ENSGALG00000005078                  | NUP210   | NUP210           | • | 6  | 4.9  | • | 8  | 5.1  |
| ENSG00000102900                     | NUP93    | NUP93            |   |    |      | • | 19 | 29.4 |
| ENSG00000108559                     | NUP88    | NUP88            |   |    |      | • | 8  | 13.9 |
| ENSG00000111581                     | NUP107   | NUP107           |   |    |      | • | 5  | 31.3 |
| ENSG00000110713                     | NUP98    | NUP98            |   |    |      | • | 4  | 11.9 |
| ENSG00000138750                     | NUP54    | NUP54            |   |    |      | • | 4  | 21.3 |
| ENSG00000163002                     | NUP35    | NUP35            |   |    |      | • | 3  | 14.6 |
| ENSG00000069248                     | NUP133   | NUP133           |   |    |      | • | 3  | 3.4  |
| ENSG00000155561                     | NUP205   | NUP205           |   |    |      | • | 4  | 3.3  |
| <b>Cyclophilins</b>                 |          |                  |   |    |      |   |    |      |
| ENSGALG00000013383                  | PPIE     | CYP-E            | • | 4  | 20.4 |   |    |      |
| ENSGALG00000004874                  | PPIH     | USA-CYP          | • | 2  | 34.1 |   |    |      |
| ENSGALG00000014747                  | SDCCAG10 | CYP16            | • | 4  | 12.4 |   |    |      |
| ENSG00000137168                     | PPIL1    | PPIL1/CWF27      | • | 2  | 12.2 |   |    |      |
| ENSG00000100023                     | PPIL2    | PPIL2/CYP60      | • | 2  | 6.1  |   |    |      |
| ENSG00000113593                     | PPWD1    | PPWD1            | • | 4  | 7.4  |   |    |      |
| <b>Novel or unknown to splicing</b> |          |                  |   |    |      |   |    |      |
| ENSGALG00000011351                  | HSP90AA1 | HSP90a           | • | 11 | 18.2 | • | 10 | 19.3 |
| ENSGALG00000010175                  | HSP90AA2 | HSP90β           | • | 18 | 23.4 | • | 9  | 14.6 |
| ENSGALG00000012726                  | HSP90B1  | HSP108           | • | 15 | 19   | • | 8  | 14.5 |
| ENSGALG00000009967                  | LRPPRC   | LRP130           | • | 19 | 13.5 |   |    |      |
| ENSGALG00000003693                  | MACF1    | Macrophin        | • | 6  | 16.9 |   |    |      |
| ENSGALG00000007705                  | NCL      | Nucleolin        | • | 10 | 16.4 |   |    |      |
| ENSGALG00000015933                  | C21ORF66 | GCRBF            | • | 3  | 5.9  |   |    |      |

|                    |         |             |   |    |      |   |    |      |
|--------------------|---------|-------------|---|----|------|---|----|------|
| ENSGALG0000008454  | -       | NOP58       | • | 5  | 12.5 |   |    |      |
| ENSGALG0000009061  | ACTL6A  | BAF53A      | • | 9  | 32   |   |    |      |
| ENSGALG0000007520  | SSRP1   | FACT80      | • | 9  | 13.8 | • | 3  | 5.6  |
| ENSGALG00000015821 | CCT8    | TCP1-theta  | • | 7  | 15.9 |   |    |      |
| ENSGALG00000014500 | NOL5A   | Nol5A/NOP56 | • | 9  | 19.4 |   |    |      |
| ENSGALG00000005624 | MED12   | TRAP230     | • | 2  | 4.6  |   |    |      |
| ENSGALG00000010973 | TRA2A   | TRA2a       | • | 4  | 20   | • | 2  | 16.8 |
| ENSGALG00000008372 | XRN2    | RAT1        | • | 8  | 10   | • | 3  | 3.7  |
| ENSG00000197157    | -       | SND1        | • | 5  | 8.8  | • | 16 | 25.9 |
| ENSGALG00000001948 | SAFB2   | SAFB/HSP27  | • | 3  | 8.2  | • | 12 | 78.9 |
| ENSGALG00000003177 | BRD8    | BRD8        | • | 4  | ***  | • | 2  | 6.9  |
| ENSGALG00000010699 | -       | FOG         | • | 3  | ***  |   |    |      |
| ENSGALG00000005177 | C9ORF10 | C9ORF10     | • | 4  | 6.8  | • | 3  | 5    |
| ENSGALG00000002653 | -       | ELG         | • | 4  | 13.2 | • | 3  | 8.7  |
| ENSGALG00000016949 | WBP4    | WBP4        | • | 5  | 14.4 |   |    |      |
| ENSGALG00000004133 | FUSIP1  | Fus IP      | • | 3  | 37.1 | • | 6  | 41.8 |
| ENSGALG00000017384 | ERH     | ERH         | • | 3  | 65.6 | • | 3  | 33.3 |
| ENSG00000079246    | XRCC5   | Ku80        |   |    |      | • | 14 | 28.1 |
| ENSG00000182562    | ATAD3A  | ATAD3A      | • | 12 | 24.4 | • | 9  | 18.6 |
| ENSGALG00000001515 | ATAD3B  | ATAD3B      | • | 10 | 19   | • | 6  | 21.3 |
| ENSG00000108588    | CCDC47  | CCDC47      |   |    |      | • | 2  | 18.4 |

<sup>a</sup> Gallus gallus polypeptide data <sup>b</sup> Number of peptides identifies for the protein <sup>c</sup> The percentage of the protein sequenced by mass spectrometry

<sup>d</sup> Human polypeptide data

\*\*\* INCOMPLETE GENE IN DATABASE. UNABLE TO ASSIGN % COVERAGE.
